# Supplementary material for: Environmental Risk Factors for Developing Type 2 Diabetes Mellitus: A Systematic Review
Source: Int J Environ Res Public Health. 2018 Jan 5;15(1):78. doi: 10.3390/ijerph15010078 (PMC5800177; doi:10.3390/ijerph15010078)
Supplement: Supplementary file 1 [file ijerph-15-00078-s001.pdf]

### Supplementary Table

**Table S1: Key characteristics of studies included in the systematic review**

| Author <sup>#</sup> / (year) | Country/<br>(income level) | Study design | No. of participants/<br>Sex | Age (years)                   | Environment focus | Exposure assessment                     | Outcome assessment | Effect size/ association (95% CIs)                                                                                                                                       | Factors adjusted                                                                                                                                                                                                                  | Study quality rating |
|------------------------------|----------------------------|--------------|-----------------------------|-------------------------------|-------------------|-----------------------------------------|--------------------|--------------------------------------------------------------------------------------------------------------------------------------------------------------------------|-----------------------------------------------------------------------------------------------------------------------------------------------------------------------------------------------------------------------------------|----------------------|
| Bodicoat, (2014) [110]       | United Kingdom (HIC)       | CSS          | 10476 / men and women       | 25-75                         | Green space       | GIS                                     | Blood test*        | OR=0.45 (0.24-0.82), highest vs lowest quartile.                                                                                                                         | Age, sex, ethnicity, rural/urban, area social deprivation, BMI, ethnicity, objective PA, cholesterol                                                                                                                              | Fair                 |
| Maas, (2009) [72]            | Netherlands (HIC)          | CSS          | 343103/ men and children    | < 12-65+                      | Green space       | Land cover database                     | Medical records    | OR=0.98 (0.97-0.99), 0.98 (0.97-1.00) with 10% more than average greenspace within 1 km and 3 km radius, respectively.                                                   | Age, sex, work status, education, health insurance, urbanicity                                                                                                                                                                    | Fair                 |
| Astell-Burt, (2014) [109]    | Australia (HIC)            | CSS          | 267072/ men and women       | 45+                           | Green space       | GIS                                     | Self-reported      | OR=0.99 (0.96-1.03), 0.90 (0.85-0.96), 0.90 (0.85-0.96), 0.91 (0.84-0.99), 0.94 (0.85-1.03) for 21-40%, 41-60%, 61-80%, >80% of greenspace, compared to <21% greenspace. | Age, sex, marital status, ancestry, birth country, language, weight, distress risk, smoking status, hypertensive, diet, PA, employment, education, income, urban/rural, area deprivation and remoteness                           | Fair                 |
| Ulmer, (2016) [111]          | USA (HIC)                  | CSS          | 4820/ men and women         | 46 (mean age), adults of < 65 | Tree cover        | High-resolution imagery, remote sensing | Self-reported      | OR=0.81 (0.64-1.03) for 10% increase in tree canopy coverage.                                                                                                            | Age, gender, ethnicity, marital status, education, employment, English proficiency, food security, income, home ownership, duration at current address, smoking, insurance, household size, poverty and survey cycle, walkability | Fair                 |

|                          |              |    |                                                        |       |                                 |                  |                                                         |                                                                                                                                                                                                                                                                         |                                                                                                                                             |      |
|--------------------------|--------------|----|--------------------------------------------------------|-------|---------------------------------|------------------|---------------------------------------------------------|-------------------------------------------------------------------------------------------------------------------------------------------------------------------------------------------------------------------------------------------------------------------------|---------------------------------------------------------------------------------------------------------------------------------------------|------|
| Auchincloss, (2009) [99] | USA (HIC)    | CS | 2285/ men and women                                    | 45-84 | PA and food environment         | Telephone survey | Blood test/ insulin use/ medication use / self-reported | HR=0.64 (0.44-0.95) for PA and healthy food combined. HR=0.71 (0.48-1.05) and 0.63 (0.42-0.93) for PA and healthy food resources respectively, difference between the 90 <sup>th</sup> and 10 <sup>th</sup> percentiles.                                                | Age, sex , ethnicity, household income and assets, education, smoking status, alcohol use, family history of diabetes, BMI, PA, diet        | Good |
| Christine, (2015) [100]  | USA (HIC)    | CS | 5124 / men and women                                   | 45-84 | PA and food environment, safety | GIS, survey      | Blood test/ insulin use/ medication use                 | HR=0.93 (0.82-1.06), 0.81 (0.68-0.96), 0.98 (0.88-1.10) for healthy food, PA and social environment respectively, corresponds to an IQR increase.                                                                                                                       | Age, sex, income, family history of T2DM, stress, educational level, race/ethnicity, alcohol use, smoking, BMI, diet, PA, neighbourhood SES | Good |
| Gebreab, (2017) [73]     | USA (HIC)    | CS | 3670 / African-American men and women                  | 21-94 | PA, food environment            | GIS, survey      | Self-reported/ blood test/ medication use               | HR=1.07(0.87-1.32) for violence, and 1.15(0.92-1.44) for problems, difference between 90 <sup>th</sup> and 10 <sup>th</sup> percentiles. HR=1.23(0.98-1.55), 1.34(1.12-1.650, and 1.11(0.97-1.26) for favourable food, unfavourable food and PA resources respectively. | Age, gender, family diabetes history, BMI, physical activity and diet                                                                       | Fair |
| Polsky, (2016) [74]      | Canada (HIC) | CS | 7079 / men and women                                   | 20-84 | Fast food restaurants (FFRs)    | ArcGIS, database | Database                                                | HR=1.27 (0.78-2.06), corresponds to one IQR increase in percentage of FFRs. HR=0.95 (0.87-1.04) and 0.92 (0.84-1.01) for absolute FFRs and total restaurants respectively.                                                                                              | Sex, age, ethnicity, immigration status, education, income, smoking, residence city, area disadvantage, walkability, survey cycle, BMI      | Fair |
| Mezuk, (2016) [103]      | Sweden (HIC) | CS | 4718583 (varied for specific analysis) / men and women | 35-80 | Food environment                | GIS              | Medical records                                         | OR=2.11 (1.57-2.82) for incident, 1.85 (1.51-2.26) for prevalent cases. OR=3.67 (2.14-6.30) among those locating to areas with more health harming food,                                                                                                                | Age, sex, education, income, neighbourhood deprivation                                                                                      | Fair |

|                           |                      |     |                                           |       |                                               |                                                                     |                                             |                                                                                                                                                                                                                                                                              |                                                                                   |      |
|---------------------------|----------------------|-----|-------------------------------------------|-------|-----------------------------------------------|---------------------------------------------------------------------|---------------------------------------------|------------------------------------------------------------------------------------------------------------------------------------------------------------------------------------------------------------------------------------------------------------------------------|-----------------------------------------------------------------------------------|------|
|                           |                      |     |                                           |       |                                               |                                                                     |                                             | 1.72 (1.27-2.33) among those who did not move but gained access to more health harming food outlets.                                                                                                                                                                         |                                                                                   |      |
| Piccolo, (2015) [105]     | USA (HIC)            | CSS | 2746/ men and women (three ethnic groups) | 30-79 | Food environment, open space, crime/ disorder | GIS, police department website, food establishment data, interviews | Self-reported/ blood test                   | OR=0.53(0.25-1.15), for those living a mile farther from a grocery store.                                                                                                                                                                                                    | Race, gender, age, income, education, PA, BMI, poverty                            | Fair |
| Bodicoat, (2014) [107]    | United Kingdom (HIC) | CSS | 10461/ men and women                      | 18-75 | Food environment                              | Online business listings                                            | Screen-detected                             | RR=1.02 (1.00-1.04), (p=0.02) for every increase in fast-food outlet number.                                                                                                                                                                                                 | Social disadvantage, age, sex, rural/urban, ethnicity                             | Poor |
| Morland, (2006) [106]     | USA (HIC)            | CSS | 10763/ men and women                      | 49-73 | Food environment                              | Agriculture and environmental health data, GIS                      | Self-reported on anti-diabetics/ blood test | PR=0.96 (0.84-1.10), 1.11 (0.99-1.24), 0.98 (0.86-1.12) lived in areas with supermarkets, grocery stores and convenience stores respectively.                                                                                                                                | Age, income, sex, race, PA, education, types of food stores and service places    | Poor |
| Frankenfeld, (2015) [104] | USA (HIC)            | ES  | 3227 blocks                               | > 18  | Food environment                              | GIS, database                                                       | Self-reported                               | Significantly lower diabetes prevalence in food source subtypes with greater restaurant and speciality food than those with grocery store within the healthier options category.                                                                                             | Neighbourhood SES and demographic factors                                         | Poor |
| Auchincloss, (2008) [98]  | USA (HIC)            | CSS | 2026/ men and women                       | 45-84 | PA and food environment                       | Survey                                                              | Blood test/ diabetes treatment              | Decrease by 6% (-30%-27%), increase by 22% (-10%-64%), 14% (2%-27%) and 3% (-7%-14%), for PA resources, healthy food resources, distance to PA resources and distance to healthy food resources, respectively, corresponding to difference between 90th and 10th percentile. | Age, sex, family diabetes history, income and education, ethnicity, PA, diet, BMI | Fair |
| Stewart, (2011) [75]      | USA (HIC)            | ES  | 442830/ men and women                     | > 18  | Food environment                              | Business directory, GIS                                             | Database                                    | OR=0.4 (0.09-1.41) and 1.5 (0.41-5.63) for per capita FFRs and convenience stores respectively                                                                                                                                                                               | Area-level SES, rurality, unemployment index                                      | Poor |
| Drewnowski,               | USA (HIC)            | ES  | 59767 (371                                | > 18  | Food                                          | Food environment                                                    | Database                                    | $\beta$ = - 0.6 (-0.9 to -0.2) for                                                                                                                                                                                                                                           | Age, ethnicity,                                                                   | Poor |

|                       |           |    |                                |           |                                                      |                        |                       |                                                                                                                                                                                                                                                                                                                                                                                                                                         |                                                                                                                                        |      |
|-----------------------|-----------|----|--------------------------------|-----------|------------------------------------------------------|------------------------|-----------------------|-----------------------------------------------------------------------------------------------------------------------------------------------------------------------------------------------------------------------------------------------------------------------------------------------------------------------------------------------------------------------------------------------------------------------------------------|----------------------------------------------------------------------------------------------------------------------------------------|------|
| (2014) [76]           |           |    | census tracts) / men and women |           | environment, home value                              | index                  |                       | each 50% increase in median home value. No association for retail food environment.                                                                                                                                                                                                                                                                                                                                                     | population density, area-based socioeconomic variables, obesity                                                                        |      |
| Salois, (2012) [102]  | USA (HIC) | ES | 3051 counties                  | > 20      | Food environment, recreational and natural amenities | Food environment atlas | Self-reported         | Significant positive association with diabetes for % of household without car and >1 mile to store, % low income and >1 mile to store, fast-food restaurant density, convenience stores without gas density. Significant negative association for full-service restaurant and farmer's market density. Other characteristics not significant.                                                                                           | Ethnicity, income, poverty rate                                                                                                        | Poor |
| Alhasan, (2016) [108] | USA (HIC) | ES | 46 counties/ men and women     | > 20      | Food environment                                     | Agriculture database   | Institutional records | $\beta = -0.55$ ( $p=0.54$ ), $0.89$ ( $p=0.31$ ), $-0.40$ ( $p=0.97$ ), $-3.70$ ( $p=0.09$ ) for density of fast food restaurants, convenience stores, super stores and grocery stores respectively.                                                                                                                                                                                                                                   | County level PA, obesity, recreational facility, education, unemployment, access to stores, household car ownership and race/ethnicity | Fair |
| Ahern, (2011) [101]   | USA (HIC) | ES | 3128 counties/ men and women   | > 20      | Food and recreational environment                    | Food environment atlas | Database              | $\beta = 0.07$ ( $p=0.01$ ), $0.41$ ( $p=0.07$ ), $-0.15$ ( $p=0.04$ ), $-0.37$ ( $p=0.09$ ), $0.03$ ( $p=0.06$ ), $-0.01$ ( $p=0.004$ ), $-0.12$ ( $p=0.21$ ) for % households without car living >1 mile from grocery store, fast-food restaurants per 1000, full service restaurants per 1000, grocery store per 1000, convenience stores per 1000, direct farm sales per capita, and recreational facilities per 1000 respectively. | Sex, poverty, doctors availability, nativity / ethnicity, education, smoking, obesity                                                  | Poor |
| Paquet, (2014) [91]   | Australia | CS | 3205/ men                      | $\geq 18$ | Walkability,                                         | ArcGIS, road           | Blood test            | RR=0.99 (0.90-1.09), 0.88                                                                                                                                                                                                                                                                                                                                                                                                               | Age, gender, income,                                                                                                                   | Fair |

|                        |              |     |                        |       |                   |                                   |                |                                                                                                                                                                                                                                                                                                                                          |                                                           |      |
|------------------------|--------------|-----|------------------------|-------|-------------------|-----------------------------------|----------------|------------------------------------------------------------------------------------------------------------------------------------------------------------------------------------------------------------------------------------------------------------------------------------------------------------------------------------------|-----------------------------------------------------------|------|
|                        | (HIC)        |     | and women              |       | POS, food outlets | network distance, retail database |                | (0.80-0.97) and 1.00 (0.92-1.08) for one standard deviation increase in relative unhealthy food environment, walkability and POS count respectively.<br>RR=0.75 (0.69-0.83), 1.01 (0.90-1.13), 1.09 (0.97-1.22) for one standard deviation increase in POS size, POS greenness and POS type respectively.                                | education, follow up duration, neighbourhoods deprivation |      |
| Booth, (2013) [85]     | Canada (HIC) | CS  | 1239262/ men and women | 30-64 | Walkability       | Walkability quintile using GIS    | Database       | RR=1.58 (1.42-1.75), 1.67 (1.48-1.88) among recent immigrant men and women respectively.<br>RR=1.32 (1.26-1.38), 1.24 (1.18-1.31) among long-term men and women residents respectively, living in least walkable areas.                                                                                                                  | Age, income (area poverty)                                | Fair |
| Sundquist, (2015) [95] | Sweden (HIC) | CS  | 512061/ men and women  | > 18  | Walkability       | Walkability index                 | Drug registers | OR=1.33 (1.13-1.55) when adjusted for neighbourhood deprivation, and OR=1.16 (1.00-1.34) upon addition of individual sociodemographic factors.<br>OR=0.97 (0.30-2.46), 1.07 (0.91-1.25), 1.23 (1.07-1.42) for residential density, street connectivity and land use mix respectively, lowest compared to highest deciles of walkability. | Age, gender, income, education, neighbourhood deprivation | Fair |
| Lee, (2015) [96]       | Korea (HIC)  | CSS | 16178/ men and women   | ≥ 20  | Walkability       | GIS, physical observation         | Database       | OR=0.86 (0.75-0.99) living in more compared to living in less walkable environment.                                                                                                                                                                                                                                                      | Smoking, alcohol use, age, sex, income                    | Fair |
| Glazier, (2014)        | Canada       | ES  | 10180 blocks/          | 30-64 | Walkability,      | Walkability index                 | Database       | PRR=1.33 (1.33-1.33), 1.26                                                                                                                                                                                                                                                                                                               | Prevalence rate                                           | Poor |

|                                     |                 |     |                                      |                 |                                                                   |                              |                            |                                                                                                                                                                                                                                                  |                                                                                                                                  |      |
|-------------------------------------|-----------------|-----|--------------------------------------|-----------------|-------------------------------------------------------------------|------------------------------|----------------------------|--------------------------------------------------------------------------------------------------------------------------------------------------------------------------------------------------------------------------------------------------|----------------------------------------------------------------------------------------------------------------------------------|------|
| [94]                                | (HIC)           |     | men and women                        |                 | walkable destinations                                             |                              |                            | (1.26-1.26) for walkability index and destination within 800m, respectively for the lowest compared to highest quintile. All individual walkability components were significant.                                                                 | adjusted for area-level age and sex                                                                                              |      |
| Müller-Riemenschneider, (2013) [92] | Australia (HIC) | CSS | 5970 /men and women                  | $\geq 25$       | Walkability                                                       | Walkability index using GIS  | Self-reported              | OR=0.79 (0.52-1.21) among participant of most walkable areas. Significant when not adjusted for PA and sedentary behaviour                                                                                                                       | Age, sex, income, marital status, education, physical activity, sedentary behaviour                                              | Fair |
| Creatore, (2016) [93]               | Canada (HIC)    | CS  | >2770000/ men and women              | 30-64           | Walkability                                                       | Walkability index using GIS  | Database                   | Incidence lower by 1.7 per 1000 persons (CI -2.8 to -0.7) in the highest compared to lowest walkability areas.                                                                                                                                   | Neighbourhood age difference, sex, income, ethnicity                                                                             | Fair |
| Cunningham-Myrie, (2015) [77]       | Jamaica (UMIC)  | CSS | 2848/ men and women                  | 15-74           | Area infrastructure, recreational space, walking distance, safety | Interviewer assessment       | Self-reported / blood test | OR=1.02 (0.95-1.10), 1.12 (0.86-1.45), 1.01 (0.77-1.32), 0.99 (0.88-1.11) and 0.99 (0.95-1.03) for increased levels of infrastructure, recreational in walking distance, recreational space, safety perception, and area disorder, respectively. | Age, sex, fruit and vegetable consumption                                                                                        | Poor |
| Schootman, (2007) [80]              | USA (HIC)       | CS  | 644/ men and women (Africa-American) | 56.2 (mean age) | Area and housing conditions                                       | Physical observation, survey | Self-reported              | OR=1.85 (1.04-3.30) and 2.12 (1.12-4.02) for adverse housing conditions adjusted for behaviour and sociodemographic factors respectively. No association for neighbourhood conditions.                                                           | Age, gender, income, education, marital status, employment, duration of stay at current address, home ownership, sampling strata | Good |
| Ewing, (2014) [97]                  | USA (HIC)       | ES  | Different sample sizes               | $\geq 30$       | Urban sprawl                                                      | Compactness index using GIS  | Self-reported              | $\beta = -0.0015$ and $-0.0016$ , ( $p=0.05$ ) for original and refined compactness index, respectively.                                                                                                                                         | Sex, age, race, income, education, smoking, fruits and vegetables consumption                                                    | Poor |
| Villanueva, (2013) [130]            | Australia (HIC) | CSS | 15954/ men and women                 | $\geq 25$       | Slope                                                             | GIS                          | Self-reported              | OR=0.72 (0.55-0.95), 0.52 (0.39-0.69) living in moderate and higher levels                                                                                                                                                                       | Age, sex, education, income, PA, diet, and destination to parks,                                                                 | Fair |

|                             |                   |     |                             |                          |                         |                                                   |                                                |                                                                                                                                                                                                                                                                                                                 |                                                                                                                                                                                                                                       |      |
|-----------------------------|-------------------|-----|-----------------------------|--------------------------|-------------------------|---------------------------------------------------|------------------------------------------------|-----------------------------------------------------------------------------------------------------------------------------------------------------------------------------------------------------------------------------------------------------------------------------------------------------------------|---------------------------------------------------------------------------------------------------------------------------------------------------------------------------------------------------------------------------------------|------|
|                             |                   |     |                             |                          |                         |                                                   |                                                | of slope, respectively.<br>OR=0.87 (0.80-0.94) for each increase in a % mean slope.                                                                                                                                                                                                                             | retail, health services, recreation, fast food/takeaway, larger food outlets, restaurants /cafes /coffee, other food                                                                                                                  |      |
| Kauhl, (2016) [131]         | Germany (HIC)     | ES  | 1.79 million/ men and women | All ages                 | General practitioners   | Inhabitants to practitioner ratio, street maps    | Database                                       | No association (effect size not provided).                                                                                                                                                                                                                                                                      | Not reported.                                                                                                                                                                                                                         | Poor |
| Heidemann, (2014) [115]     | Germany (HIC)     | CS  | 3604/ men and women         | 18-79                    | Traffic                 | Self-reported                                     | Self-reported/ on anti-diabetic drugs/ insulin | OR=1.15 (0.80-1.67), 1.11 (0.69-1.80), 1.41 (0.96-2.08), and 1.97 (1.07-3.64) for moderate, considerable, heavy and extreme respectively than no/very rare traffic.                                                                                                                                             | Sex, age, smoking, passive smoking, heating of house, education, waist size, sports, parental history of diabetes                                                                                                                     | Fair |
| Ward-Caviness, (2015) [117] | USA (HIC)         | CSS | 2124 / men and women        | 61.3 (mean age) (adults) | Traffic, road proximity | GIS                                               | Blood test                                     | OR=1.00 (0.88-1.13) for an IQR decrease in the distance to roadways. No or no strong association by traffic exposure zones.                                                                                                                                                                                     | Ethnicity, sex, BMI, smoking, home value                                                                                                                                                                                              | Fair |
| Sorensen, (2013) [112]      | Denmark (HIC)     | CS  | 53673/ men and women        | 50-64                    | Traffic, railway noise  | SoundPLAN, Nordic prediction method using GIS     | National registry                              | IRR=1.08 (1.02-1.14) and 1.11 (1.05-1.18) for a 10 dB higher level of road traffic noise at current residence and during 5 years preceding diagnosis for all diabetes. IRR=0.97 (0.89-1.05) and 1.01 (0.91-1.11), for exposure to railway noise of $\geq 60$ dB among all and confirmed diabetes, respectively. | Age, sex, BMI, waist size, smoking, environmental tobacco smoke, saturated fat intake, alcohol, sports, bicycling, walking, fruits and vegetables, air pollution, lifestyle education, occupation, area SES, NO <sub>x</sub> exposure | Good |
| Eriksson, (2014) [71]       | Sweden (HIC)      | CS  | 5156/ men and women         | 35-56                    | Aircraft noise          | GIS                                               | Blood test                                     | OR=0.91 (0.78-1.04), 1.03 (0.84-1.26) for prediabetes and T2DM respectively, for a unit increase in noise.                                                                                                                                                                                                      | Sex, age, family history, SES, PA, tobacco, distress, mean income, unemployment rate                                                                                                                                                  | Fair |
| Eze, (2017) [113]           | Switzerland (HIC) | CS  | 2363/ men and women         | Adults                   |                         | Noise emission and propagation models, dispersion | Blood test/ self-reported on                   | RR=1.35 (1.02-1.78), 1.87 (0.96-3.62), 0.94 (0.71-1.24), 0.87 (0.60-1.22) for per IQR                                                                                                                                                                                                                           | Ag, sex, education, area SES, income, crowding, mean                                                                                                                                                                                  | Fair |

|                        |                |     |                      |       |                                                              |                                                   |                   |                                                                                                                                                                                                                                                                                                                                                                                                                                                                                                                                                                                  |                                                                                                                                                                                                                                           |      |
|------------------------|----------------|-----|----------------------|-------|--------------------------------------------------------------|---------------------------------------------------|-------------------|----------------------------------------------------------------------------------------------------------------------------------------------------------------------------------------------------------------------------------------------------------------------------------------------------------------------------------------------------------------------------------------------------------------------------------------------------------------------------------------------------------------------------------------------------------------------------------|-------------------------------------------------------------------------------------------------------------------------------------------------------------------------------------------------------------------------------------------|------|
|                        |                |     |                      |       |                                                              | and land use regression models                    | medication        | increase in day-evening-night road noise, aircraft noise, railway noise and NO <sub>2</sub> respectively. HR=2.08 (1.06-4.08) among those in highest noise level quartile. No strong associations with PM <sub>2.5</sub> .                                                                                                                                                                                                                                                                                                                                                       | household rent, smoking, passive-smoke exposure, alcohol, fruits and vegetable consumption, PA, BMI, noise annoyance, green areas                                                                                                         |      |
| Dzhambov, (2016) [114] | Bulgaria (HIC) | CSS | 513/ men and women   | > 18  | Noise, PM <sub>2.5</sub> , BaP (benzo alpha pyrene), traffic | Dispersion models, traffic noise maps and surveys | Self-reported     | OR=4.49 (1.38-14.68) for day-evening-night equivalent sound of 71-80 dB compared to 51-70 dB. OR=1.32 (0.28-6.24) for PM <sub>2.5</sub> 25.0-66.8 µg/m <sup>3</sup> than 0.0-25.0 µg/m <sup>3</sup> . OR=1.76 (0.52-5.59) for BaP 6.0-14.02 ng/m <sup>3</sup> compared to 0.0-6.0 ng/m <sup>3</sup> . OR=1.40 (0.8-4.07) for high self-reported traffic intensity.                                                                                                                                                                                                               | Age, gender, ethnicity, education, marital status, occupation, SES, BMI, PA, diet, alcohol use, smoking, family history of diabetes, duration of stay at current address, bedroom location, sleeping with open windows, sleep disturbance | Fair |
| Andersen, (2012) [116] | Denmark (HIC)  | CS  | 51818/ men and women | 50-65 | NO <sub>2</sub> , NO <sub>x</sub> , road proximity, traffic  | AirGIS human exposure modelling                   | National register | HR=1.00 (0.97-1.03), 1.00 (0.97-1.04), 0.98 (0.95-1.01), 1.00 (0.90-1.11), 1.00 (0.98-1.02), 1.01 (0.98-1.03) for an IQR increase in NO <sub>2</sub> 1971 to follow-up, NO <sub>2</sub> 1991 to follow-up, NO <sub>2</sub> at baseline, major road within 50m, traffic load within 100m and NO <sub>2</sub> at follow-up respectively, among all diabetes cases. HR=1.04 (1.00-1.08), 1.04 (1.01-1.07), 1.02 (0.98-1.05), 1.07 (0.95-1.21), 1.02 (1.00-1.04), 1.04 (1.01-1.07) corresponding effect among confirmed cases. Similar but weaker associations for NO <sub>x</sub> . | Age, sex, BMI, waist-to-hip ratio, smoking, environmental tobacco smoke, education, PA, alcohol intake, fruit and fat intake, calendar year                                                                                               | Good |

|                      |              |    |                                 |       |                                     |                                                                                 |               |                                                                                                                                                                          |                                                                                                                                                                     |      |
|----------------------|--------------|----|---------------------------------|-------|-------------------------------------|---------------------------------------------------------------------------------|---------------|--------------------------------------------------------------------------------------------------------------------------------------------------------------------------|---------------------------------------------------------------------------------------------------------------------------------------------------------------------|------|
| Coogan, (2012) [83]  | USA (HIC)    | CS | 3992/ women (African origin)    | 21-69 | PM <sub>2.5</sub> , NO <sub>x</sub> | Kriging for PM <sub>2.5</sub> and land use regression model for NO <sub>x</sub> | Self-reported | IRR=1.15 (0.51-2.58), 1.24 (1.05-1.45), corresponding to 10 unit PM <sub>2.5</sub> increase and IQR increase of NO <sub>x</sub> respectively.                            | Age, BMI, education, income, number of household members, smoking, drinking, PA, neighbourhood SES, family history of diabetes                                      | Fair |
| Coogan, (2016) [88]  | USA (HIC)    | CS | 43003/ women (African origin)   | ≥ 30  | NO <sub>2</sub>                     | Land use regression model and dispersion model                                  | Self-reported | HR=0.96 (0.88-1.06), 0.94 (0.80-1.10) using land use regression and dispersion model respectively, corresponds to per IQR increase.                                      | Age, metropolitan area, education, vigorous exercise, BMI, smoking, diet                                                                                            | Fair |
| Chen, (2013) [122]   | Canada (HIC) | CS | 60076 / men and women           | ≥ 35  | PM <sub>2.5</sub>                   | Satellite based estimation using spectroradiometer                              | Database      | HR=1.11 (1.02-1.21) for 10 µg/m <sup>3</sup> increase.                                                                                                                   | Smoking, sex, marital status, education, household income, BMI, PA, smoking, alcohol, diet, hypertension, urbanicity, race, and area SES, comorbid conditions       | Good |
| Coogan, (2016) [89]  | USA (HIC)    | CS | 43003 / women (African origin)  | 30-69 | PM <sub>2.5</sub>                   | Land-use regression and Bayesian maximum entropy models                         | Self-reported | HR=0.99 (0.90-1.09) per 2.9 µg/m <sup>3</sup> increase.                                                                                                                  | Age, metro area, questionnaire cycle, BMI, area SES, education, exercise, diet                                                                                      | Good |
| Jerrett, (2017) [79] | USA (HIC)    | CS | 43003/ women (African-American) | 21-69 | Ozone                               | Bayesian space-time model using monitoring data.                                | Self-reported | HR=1.18 (1.04-1.34) for an IQR increase in O <sub>3</sub> . HR=1.20 (1.05-1.37) and 1.13 (0.97-1.31) upon PM <sub>2.5</sub> and NO <sub>2</sub> adjustment respectively. | Age, period, city, smoking, education, fruit and vegetable, PA, family history of diabetes, BMI, area SES                                                           | Fair |
| To, (2015) [84]      | Canada (HIC) | CS | 29549/ women                    | 40-59 | PM <sub>2.5</sub>                   | Satellite-based estimates                                                       | Database      | PRR=1.28 (1.16-1.41), and IRR = 1.28 (1.13-1.45) corresponds to per unit (10 µg/m <sup>3</sup> ) increase.                                                               | Age, education, occupation, marital status, smoking, BMI, mean income, proportion with high school education, low income households, unemployment, smoking, obesity | Fair |

|                        |               |    |                      |       |                                                                              |                                                                                     |                                        |                                                                                                                                                                                                                                                                                                                                                       |                                                                                                                                                           |      |
|------------------------|---------------|----|----------------------|-------|------------------------------------------------------------------------------|-------------------------------------------------------------------------------------|----------------------------------------|-------------------------------------------------------------------------------------------------------------------------------------------------------------------------------------------------------------------------------------------------------------------------------------------------------------------------------------------------------|-----------------------------------------------------------------------------------------------------------------------------------------------------------|------|
| Puett, (2011) [119]    | USA (HIC)     | CS | 89460/ men and women | 30-55 | PM <sub>2.5</sub> , PM <sub>10</sub> , PM <sub>10-2.5</sub> , road proximity | Spatiotemporal models using monitoring and GIS data, distance using GIS             | Self-reported                          | HR=1.03 (0.96-1.10), 1.04 (0.99-1.09), 1.04 (0.99-1.09) for an IQR increase in PM <sub>2.5</sub> , PM <sub>10</sub> and PM <sub>10-2.5</sub> respectively.<br>HR=1.11 (1.01-1.23), 0.96 (0.63-1.48), 0.96 (0.87-1.06) for 0-49m, 50-99m and 100-199m respectively, than $\geq 200$ m.<br>HR=1.14 (1.03-1.27) for $< 50$ m than $\geq 200$ m in women. | Age, season, year, state of residence, time varying covariates (smoking, hypertension, alcohol consumption, diet), PA, BMI                                | Good |
| Kramer, (2010) [82]    | Germany (HIC) | CS | 1775/ women          | 54-55 | PM <sub>10</sub> , NO <sub>2</sub> , Soot                                    | Monitoring station and emission inventory data, land use regression model           | Self-reported                          | HR=1.16 (0.81-1.65), 1.34 (1.02-1.76) for PM <sub>10</sub> and NO <sub>2</sub> respectively from monitoring stations.<br>HR=1.15 (1.04-1.27), 1.15 (1.04-1.27) for PM and NO <sub>2</sub> from emission inventory.<br>HR=1.27 (1.09-1.48), 1.42 (1.16-1.73) for soot and NO <sub>2</sub> from land use regression (corresponds to per IQR increase).  | Age, BMI, fossil fuel heating, work place exposure, temperature, smoking, education                                                                       | Good |
| Hansen, (2016) [81]    | Denmark (HIC) | CS | 24174/ women         | > 44  | PM <sub>2.5</sub> , PM <sub>10</sub> , NO <sub>2</sub> , NO <sub>x</sub>     | AirGIS dispersion model                                                             | Diabetes register                      | HR=1.11 (1.02-1.22), 1.06 (0.98-1.14), 1.05 (0.99-1.12), 1.01 (0.98-1.05) per IQR increase in PM <sub>2.5</sub> , PM <sub>10</sub> , NO <sub>2</sub> and NO <sub>x</sub> respectively.<br>HR=1.41 (1.05-1.88), 1.22 (0.93-1.59) per 10 $\mu\text{g}/\text{m}^3$ IQR increase in PM <sub>2.5</sub> and PM <sub>10</sub> .                              | Age, calendar year, smoking, PA, alcohol use, fruits and vegetable, fat consumption, employment, marital status, BMI, hypertension, myocardial infarction | Good |
| Weinmayr, (2015) [120] | Germany (HIC) | CS | 3607 / men and women | 45-75 | PM <sub>2.5</sub> , PM <sub>10</sub> , road proximity                        | Dispersion and transport model using emission, meteorology and topography data, GIS | Self-reported/ on medicine/ blood test | RR=1.05 (1.00-1.10), 1.03 (0.95-1.12), 1.36 (0.98-1.89), 1.36 (0.97-1.89) per 1 $\mu\text{g}/\text{m}^3$ increase of PM <sub>10ALL</sub> , PM <sub>2.5ALL</sub> , PM <sub>10TRA</sub> , PM <sub>2.5TRA</sub> respectively.<br>RR=1.37 (1.04-1.81), 0.77 (0.57-1.04) for $\leq 100$ m and                                                              | Age, sex, lifestyle factors, BMI, individual and area SES, city                                                                                           | Fair |

|                         |                   |     |                        |                 |                                                                                                                               |                                                                                             |               |                                                                                                                                                                                                                                                                                                                        |                                                                                                                              |      |
|-------------------------|-------------------|-----|------------------------|-----------------|-------------------------------------------------------------------------------------------------------------------------------|---------------------------------------------------------------------------------------------|---------------|------------------------------------------------------------------------------------------------------------------------------------------------------------------------------------------------------------------------------------------------------------------------------------------------------------------------|------------------------------------------------------------------------------------------------------------------------------|------|
|                         |                   |     |                        |                 |                                                                                                                               |                                                                                             |               | 100-200m of distance to major road than >200m.                                                                                                                                                                                                                                                                         |                                                                                                                              |      |
| Park, (2015) [121]      | USA (HIC)         | CS  | 10974/ men and women   | 45-84           | PM <sub>2.5</sub> , NO <sub>x</sub> , roadway proximity                                                                       | Spatiotemporal model based on air quality, land use and traffic data. ArcGIS, road network. | Blood test    | OR=1.16 (0.94-1.42), 1.29 (0.94-1.76) for an IQR increase in PM <sub>2.5</sub> and NO <sub>x</sub> respectively. HR = 1.05 (0.87-1.26), 1.04 (0.77-1.40) for incident cases. No significant association for major roadways proximity.                                                                                  | Age, sex, race/ethnicity, family history of diabetes, education, smoking, alcohol consumption, PA, area SES, BMI, study site | Good |
| Tong, (2015) [128]      | China (UMIC)      | CSS | ~ 77000/ men and women | > 4             | PM <sub>10</sub> , SO <sub>2</sub> , NO <sub>2</sub>                                                                          | Environment monitoring website                                                              | Database      | % diabetes morbidity increase=0.39% (-0.42 to 1.12), 0.15% (-0.25 to 0.54), 1.22% (0.51 to 2.96) for increase in 10 µg/m <sup>3</sup> of PM <sub>10</sub> , SO <sub>2</sub> and NO <sub>2</sub> , respectively.                                                                                                        | Age, sex, seasonality, time-varying influences on admission, temperature /humidity, day of the week                          | Poor |
| Teichert, (2013) [87]   | Germany (HIC)     | CSS | 363/ women             | 54-55           | NO <sub>x</sub> , NO <sub>2</sub> , PM <sub>2.5</sub> absorbance, PM <sub>2.5</sub> , PM <sub>coarse</sub> , PM <sub>10</sub> | GIS, monitoring station data and land use regression models                                 | Blood test    | OR=1.218 (0.909-1.630), 1.224 (0.926-1.617), 1.110 (0.889-1.385), 1.117 (0.808-1.543), 1.075 (0.833-1.388), 1.145 (0.896-1.465) corresponds to an increase in one IQR of NO <sub>2</sub> , NO <sub>x</sub> , PM <sub>2.5</sub> absorbance, PM <sub>2.5</sub> , PM <sub>coarse</sub> , PM <sub>10</sub> , respectively. | Age, BMI, smoking, passive smoking, indoor mould, education and season of blood sampling                                     | Fair |
| Tahmasebi, (2015) [127] | Iran (UMIC)       | CSS | 1467/ men and women    | Adult           | Air quality                                                                                                                   | ArcGIS                                                                                      | Self-reported | No significant association found. (R <sup>2</sup> =0.08).                                                                                                                                                                                                                                                              | Not mentioned                                                                                                                | Poor |
| Sohn, (2017) [126]      | South Korea (HIC) | CSS | 96068/ men and women   | 46.7 (mean age) | PM <sub>10</sub> , SO <sub>2</sub>                                                                                            | Monitoring station data                                                                     | Self-reported | OR=1.003 (0.998-1.008), 1.008 (1.003-1.013) with each 1000ppm increase in PM <sub>10</sub> among males and females respectively. OR=0.979 (0.952-1.006), 1.032 (1.004-1.062) with each 1000ppm increase in SO <sub>2</sub> among males and females respectively.                                                       | Age, BMI, household income, economic activity, education, and smoking                                                        | Fair |
| Lazarevic, (2015) [86]  | Australia (HIC)   | CSS | 26991/ women           | 31-36, 59-64,   | NO <sub>2</sub> , road proximity                                                                                              | Satellite-based land use regression                                                         | Self-reported | RR=1.04 (0.90-1.20), 0.99 (0.95-1.04), 0.98 (0.94-1.02)                                                                                                                                                                                                                                                                | Age, BMI, smoking, alcohol consumption,                                                                                      | Fair |

|                       |                   |     |                      |           |                                           |                                                                        |                                           |                                                                                                                                                                                                                                           |                                                                                                                                                                 |      |
|-----------------------|-------------------|-----|----------------------|-----------|-------------------------------------------|------------------------------------------------------------------------|-------------------------------------------|-------------------------------------------------------------------------------------------------------------------------------------------------------------------------------------------------------------------------------------------|-----------------------------------------------------------------------------------------------------------------------------------------------------------------|------|
|                       |                   |     |                      | and 85-90 |                                           | models                                                                 |                                           | corresponding to an IQR NO <sub>2</sub> increase, doubling in the distance to major road and doubling in the distance to minor road, respectively.                                                                                        | PA, fruits and vegetables intake, residential urbanization, temperature, marital status, education, financial resources                                         |      |
| Eze, (2014) [123]     | Switzerland (HIC) | CSS | 6392/ men and women  | 29-73     | PM <sub>10</sub> , NO <sub>2</sub>        | Dispersion models, a hybrid model involving land use regression model. | Self-reported / blood test/ on medication | OR=1.19 (1.03-1.38), 1.40 (1.17-1.67) corresponding to per 10 µg/m <sup>3</sup> increase in NO <sub>2</sub> and PM <sub>10</sub> respectively, for single pollutant model. OR=1.02 (0.84-1.25), 1.37 (1.02-1.84) for two-pollutant model. | Age, sex, BMI, education, area SES, smoking, environmental tobacco smoke, alcohol use, occupational exposure, fruits and vegetables consumption, noise exposure | Fair |
| Liu, (2016) [124]     | China (UMIC)      | CSS | 11847/ men and women | ≥ 45      | PM <sub>2.5</sub>                         | ArcGIS, satellite model using spectroradiometer                        | Blood test/ self-reported                 | PR=1.14 (1.08-1.20) for an IQR increase in PM <sub>2.5</sub> .                                                                                                                                                                            | Age, sex, residence location, education, BMI, smoking, alcohol use, heating energy type, ozone                                                                  | Fair |
| Dijkema, (2011) [118] | Netherlands (HIC) | CSS | 8018/ men and women  | 50-75     | NO <sub>2</sub> , road proximity, traffic | Land use regression, GIS                                               | Self-reported/ blood test                 | OR=0.80 (0.63-1.02), 0.88 (0.70-1.13), 0.96 (0.75-1.22), 1.09 (0.85-1.38) in the highest than lowest quartile of NO <sub>2</sub> , distance to main road, traffic flow, traffic within 250m buffer, respectively.                         | Income, age, gender                                                                                                                                             | Poor |
| Brook, (2008) [129]   | USA (HIC)         | CSS | 7634/ men and women  | ≥ 40      | NO <sub>2</sub>                           | ArcGIS                                                                 | Database                                  | OR=1.04 (1.00-1.08), 0.99 (0.95-1.03), 1.015 (0.98-1.049) for females, males and both sexes respectively, corresponds to increases in over 1 ppb.                                                                                         | Age, BMI, neighbourhood income                                                                                                                                  | Poor |
| Chien, (2015) [125]   | USA (HIC)         | ES  | 3109 counties        | >18       | PM <sub>2.5</sub>                         | Air quality monitoring system data                                     | Self-reported                             | RR=-5.47% (-6.14 - -4.77) to 2.34% (2.0-2.70), increase for every unit increase in PM <sub>2.5</sub> concentration.                                                                                                                       | SES variables (male, education, ethnicity family income, occupation, health insurance-all in %),                                                                | Poor |

|                      |           |    |                             |           |                   |                             |               |                                                                                                                                        |                                                                                                     |      |
|----------------------|-----------|----|-----------------------------|-----------|-------------------|-----------------------------|---------------|----------------------------------------------------------------------------------------------------------------------------------------|-----------------------------------------------------------------------------------------------------|------|
|                      |           |    |                             |           |                   |                             |               |                                                                                                                                        | PA, obesity and smoking prevalence, time                                                            |      |
| Pearson, (2010) [78] | USA (HIC) | ES | 766 counties/ men and women | $\geq 20$ | PM <sub>2.5</sub> | Database and air model data | Self-reported | $\beta=0.78$ (0.39-1.25), 0.81 (0.48-1.07) for 2004 and 2005 respectively, corresponds to % increase per 10 $\mu\text{g}/\text{m}^3$ . | Age, sex, income, education, ethnicity, health insurance, obesity, PA, latitude, population density | Poor |

\*only the surname of the first author is used in this table, CI: confidence intervals, HIC: high-income country, CSS: cross-sectional study, GIS: geographic information system, \*includes all blood test to diagnose T2DM, OR: odds ratio, BMI: body mass index, PA: physical activity, CS: cohort study, HR: hazard ratio, IQR: inter quartile range, T2DM: type 2 diabetes mellitus, SES: socioeconomic status, RR: relative risk, PR: prevalence ratio, ES: ecological study, POS: public open space, PRR: prevalence rate ratio, UMIC: upper middle-income country, IRR: incidence rate ratio, NO: nitrogen oxides, PM: particulate matter of different sizes, SO<sub>2</sub>: sulphur dioxide, ppm: parts per million, ppb: parts per billion.
